# Supplementary material for: A Comparison of Non-Destructive Visceral Swab and Tissue Biopsy Sampling Methods for Genotyping-by-Sequencing in the Freshwater Mussel Fusconaia askewi
Source: MDPI journal article supplement (doi:10.3390/genes14061197), 2023-05-30

Table S1. DNA concentrations (ng/ml) as measured with a Qubit system for each sample. Each individual was measured three times (Measure 1, Measure 2, and Measure 3). Also provided are the mean and one standard deviation (SD) for each individual sampled.

|                   |               | Tissue    |           |           |             |             | Swab      |           |           |             |             |
|-------------------|---------------|-----------|-----------|-----------|-------------|-------------|-----------|-----------|-----------|-------------|-------------|
| Individual number | Sample ID     | Measure 1 | Measure 2 | Measure 3 | Mean        | SD          | Measure 1 | Measure 2 | Measure 3 | Mean        | SD          |
| 1                 | FUCH-SAB01-01 | 44.9      | 48.8      | 50        | <b>47.9</b> | <b>2.7</b>  | 30.5      | 36.3      | 36.8      | <b>34.5</b> | <b>3.5</b>  |
| 2                 | FUCH-SAB01-02 | 18.7      | 22.5      | 23.6      | <b>21.6</b> | <b>2.6</b>  | 15.4      | 17.2      | 19.2      | <b>17.3</b> | <b>1.9</b>  |
| 3                 | FUCH-SAB01-07 | 30.4      | 32.1      | 32.7      | <b>31.7</b> | <b>1.2</b>  | 0         | 0         | 0.1       | <b>0.02</b> | <b>0</b>    |
| 4                 | FUCH-SAB01-09 | 12.1      | 13.6      | 14.8      | <b>13.5</b> | <b>1.4</b>  | 24.2      | 28.9      | 29.4      | <b>27.5</b> | <b>2.9</b>  |
| 5                 | FUCH-SAB01-16 | 48.7      | 52        | 53        | <b>51.2</b> | <b>2.3</b>  | 41.1      | 47.6      | 49        | <b>45.9</b> | <b>4.2</b>  |
| 6                 | FUCH-SAB01-17 | 12.3      | 14.7      | 15.7      | <b>14.2</b> | <b>1.8</b>  | 17.8      | 25.7      | 26        | <b>23.2</b> | <b>4.7</b>  |
| 7                 | FUCH-SAB01-20 | 41        | 43.1      | 37.6      | <b>40.6</b> | <b>2.8</b>  | 23.8      | 21.7      | 21.9      | <b>22.5</b> | <b>1.2</b>  |
| 8                 | FUCH-SAB01-22 | 29.1      | 26.8      | 27.7      | <b>27.9</b> | <b>1.2</b>  | 23.9      | 34.4      | 35.1      | <b>31.1</b> | <b>6.3</b>  |
| 9                 | FUCH-SAB08-03 | 48.9      | 57        | 60        | <b>55.3</b> | <b>5.7</b>  | 24.4      | 26.4      | 28.4      | <b>26.4</b> | <b>2</b>    |
| 10                | FUCH-SAB08-08 | 47.8      | 48.3      | 50        | <b>48.7</b> | <b>1.2</b>  | 29.4      | 31.2      | 34.3      | <b>31.6</b> | <b>2.5</b>  |
| 11                | FUCH-SAB08-13 | 51.1      | 53        | 55.9      | <b>53.3</b> | <b>2.4</b>  | 50        | 53        | 55        | <b>52.7</b> | <b>2.5</b>  |
| 12                | FUCH-SAB08-15 | 43.9      | 49.2      | 47.3      | <b>46.8</b> | <b>2.7</b>  | 17.1      | 20.4      | 19.9      | <b>19.1</b> | <b>1.8</b>  |
| 13                | FUCH-SAB08-16 | 22.9      | 25.3      | 26.7      | <b>25</b>   | <b>1.9</b>  | 24.4      | 28        | 29.2      | <b>27.2</b> | <b>2.5</b>  |
| 14                | FUCH-SAB08-20 | 27.7      | 30        | 30.9      | <b>29.5</b> | <b>1.7</b>  | 27.1      | 31.9      | 31.4      | <b>30.1</b> | <b>2.6</b>  |
|                   |               |           |           |           | <b>Mean</b> | <b>36.2</b> |           |           |           |             |             |
|                   |               |           |           |           | <b>SD</b>   | <b>14.6</b> |           |           |           |             |             |
|                   |               |           |           |           |             |             |           |           |           | <b>Mean</b> | <b>27.8</b> |
|                   |               |           |           |           |             |             |           |           |           | <b>SD</b>   | <b>12.5</b> |

Table S2. Number of raw reads for each sampling method from each individual. Also provided are the mean and standard deviation (SD) for each individual.

| Individual number | Individual    | Tissue reads        | Swab Reads        |
|-------------------|---------------|---------------------|-------------------|
| 1                 | FUCH-SAB01-01 | 1,368,358           | 345,646           |
| 2                 | FUCH-SAB01-02 | 1,923,997           | 662,776           |
| 3                 | FUCH-SAB01-07 | 1,001,351           | 661               |
| 4                 | FUCH-SAB01-09 | 1,670,977           | 553,615           |
| 5                 | FUCH-SAB01-16 | 1,362,617           | 441,449           |
| 6                 | FUCH-SAB01-17 | 1,129,177           | 247,797           |
| 7                 | FUCH-SAB01-20 | 1,510,733           | 317,635           |
| 8                 | FUCH-SAB01-22 | 1,564,947           | 375,755           |
| 9                 | FUCH-SAB08-03 | 1,851,847           | 807,834           |
| 10                | FUCH-SAB08-08 | 1,929,548           | 820,802           |
| 11                | FUCH-SAB08-13 | 1,674,671           | 670,438           |
| 12                | FUCH-SAB08-15 | 1,646,674           | 631,645           |
| 13                | FUCH-SAB08-16 | 1,924,218           | 737,314           |
| 14                | FUCH-SAB08-20 | 1,964,966           | 652,422           |
| <b>Mean</b>       |               | <b>1,608,862.93</b> | <b>518,984.93</b> |
| <b>SD</b>         |               | <b>307,129.83</b>   | <b>238,072.90</b> |

Table S3. Median, mean, and standard deviation (SD) of read depth for each sample type when aligned to the tissue-based control reference.

| Individual number | Individual    | Tissue Samples |             |      | Swab Samples |             |       |
|-------------------|---------------|----------------|-------------|------|--------------|-------------|-------|
|                   |               | Median         | Mean        | SD   | Median       | Mean        | SD    |
| 1                 | FUCH-SAB01-01 | 3              | 4.51        | 6.25 | 3            | 5.88        | 9.59  |
| 2                 | FUCH-SAB01-02 | 4              | 6.28        | 8.60 | 5            | 10.95       | 17.94 |
| 3                 | FUCH-SAB01-07 | 2              | 3.35        | 4.84 | 0            | 0.01        | 0.10  |
| 4                 | FUCH-SAB01-09 | 4              | 5.62        | 8.19 | 5            | 8.97        | 14.32 |
| 5                 | FUCH-SAB01-16 | 3              | 4.45        | 6.57 | 4            | 7.47        | 11.86 |
| 6                 | FUCH-SAB01-17 | 3              | 3.81        | 5.45 | 2            | 3.94        | 6.89  |
| 7                 | FUCH-SAB01-20 | 3              | 5.00        | 7.66 | 3            | 5.04        | 8.17  |
| 8                 | FUCH-SAB01-22 | 4              | 5.36        | 7.59 | 3            | 6.44        | 10.80 |
| 9                 | FUCH-SAB08-03 | 4              | 5.97        | 8.31 | 7            | 13.74       | 22.60 |
| 10                | FUCH-SAB08-08 | 5              | 6.58        | 9.25 | 7            | 14.55       | 24.34 |
| 11                | FUCH-SAB08-13 | 4              | 5.46        | 7.45 | 5            | 10.70       | 16.87 |
| 12                | FUCH-SAB08-15 | 4              | 5.21        | 7.67 | 5            | 10.52       | 17.86 |
| 13                | FUCH-SAB08-16 | 4              | 6.45        | 9.20 | 6            | 12.44       | 20.08 |
| 14                | FUCH-SAB08-20 | 4              | 6.36        | 9.00 | 5            | 10.77       | 18.57 |
| <b>Mean</b>       |               | <b>3.64</b>    | <b>5.31</b> |      | <b>4.29</b>  | <b>8.67</b> |       |
| <b>SD</b>         |               | <b>0.74</b>    | <b>1.00</b> |      | <b>1.94</b>  | <b>4.08</b> |       |

Table S4. Median, mean, and standard deviation (SD) of read depth for each sample type when aligned to their respective *de novo* references (e.g., swab samples aligned to swab-only reference).

| Individual number | Individual    | Tissue Samples |              |       | Swab Samples |              |        |
|-------------------|---------------|----------------|--------------|-------|--------------|--------------|--------|
|                   |               | Median         | Mean         | SD    | Median       | Mean         | SD     |
| 1                 | FUCH-SAB01-01 | 6              | 10.46        | 18.46 | 16           | 29.72        | 35.84  |
| 2                 | FUCH-SAB01-02 | 8              | 14.99        | 25.41 | 30           | 57.43        | 72.40  |
| 3                 | FUCH-SAB01-07 | 4              | 7.91         | 14.68 | 0            | 0.06         | 0.37   |
| 4                 | FUCH-SAB01-09 | 7              | 13.58        | 24.77 | 24           | 46.70        | 60.60  |
| 5                 | FUCH-SAB01-16 | 5              | 10.21        | 20.30 | 20           | 39.36        | 49.70  |
| 6                 | FUCH-SAB01-17 | 5              | 8.92         | 16.87 | 10           | 18.78        | 24.50  |
| 7                 | FUCH-SAB01-20 | 7              | 12.82        | 22.04 | 12           | 25.55        | 34.25  |
| 8                 | FUCH-SAB01-22 | 7              | 13.11        | 23.19 | 18           | 33.68        | 40.47  |
| 9                 | FUCH-SAB08-03 | 7              | 14.05        | 25.05 | 34           | 73.05        | 96.86  |
| 10                | FUCH-SAB08-08 | 8              | 15.41        | 29.12 | 37           | 80.09        | 112.50 |
| 11                | FUCH-SAB08-13 | 7              | 13.16        | 21.59 | 27           | 54.19        | 66.99  |
| 12                | FUCH-SAB08-15 | 6              | 12.27        | 22.71 | 28           | 53.61        | 66.79  |
| 13                | FUCH-SAB08-16 | 9              | 15.86        | 27.13 | 33           | 64.92        | 84.33  |
| 14                | FUCH-SAB08-20 | 9              | 15.67        | 26.06 | 28           | 55.38        | 73.40  |
| <b>Mean</b>       |               | <b>6.79</b>    | <b>12.74</b> |       | <b>22.64</b> | <b>45.18</b> |        |
| <b>SD</b>         |               | <b>1.48</b>    | <b>2.53</b>  |       | <b>10.50</b> | <b>22.04</b> |        |

Figure S1: PCA plots for all four datasets: A) swab aligned to swab reference, B) tissue aligned to tissue reference, C) swab aligned to control reference, D) tissue aligned to control reference.

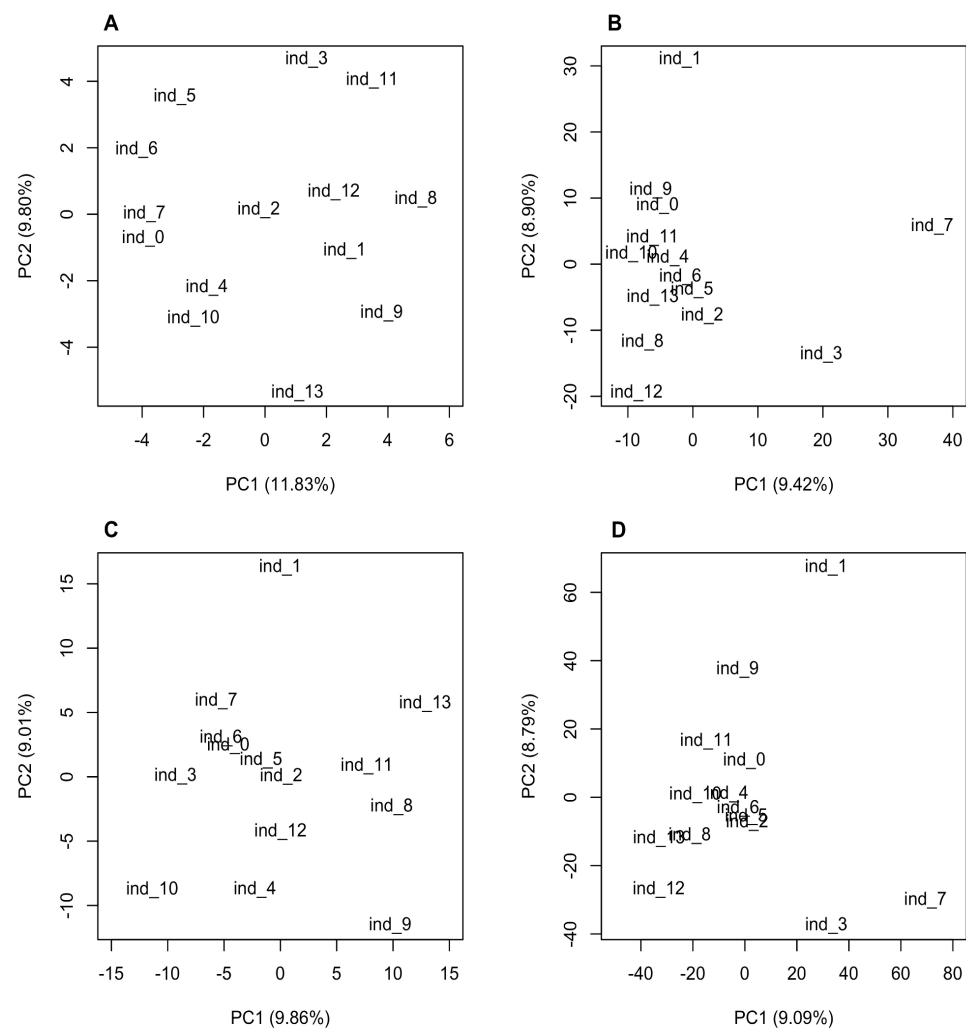

Supplement: s1 [file s1]
